# Supplementary material for: TGF-β-mediated activation of fibroblasts in cervical cancer: implications for tumor microenvironment and prognosis
Source: PeerJ. 2025 Mar 19;13:e19072. doi: 10.7717/peerj.19072 (PMC11929507; doi:10.7717/peerj.19072)
Supplement: Supplemental Information 1 [file peerj-13-19072-s001.xls]

## Sheet: Sheet1
ITEM TO CHECK	IMPORTANCE	CHECKLIST
EXPERIMENTAL DESIGN
Definition of experimental and control groups	E	P10line190-195
Number within each group	E	P10line190-195
Assay carried out by core lab or investigator's lab?	D	Not Applicable
Acknowledgement of authors' contributions	D	Not Applicable
SAMPLE
Description	E	P11-12line227-234
Volume/mass of sample processed	D	Not Applicable
Microdissection or macrodissection	E	P11-12line227-234
Processing procedure	E	P11-12line227-234
If frozen - how and how quickly?	E	P11-12line227-234
If fixed - with what, how quickly?	E	P11-12line227-234
Sample storage conditions and duration (especially for FFPE samples)	E	P11-12line227-234
NUCLEIC ACID EXTRACTION
Procedure and/or instrumentation	E	P11-12line227-234
Name of kit and details of any modifications	E	P11-12line227-234
Source of additional reagents used	D	Not Applicable
Details of DNase or RNAse treatment	E	P11-12line227-234
Contamination assessment (DNA or RNA)	E	P11-12line227-234
Nucleic acid quantification	E	P11-12line227-234
Instrument and method	E	P11-12line227-234
Purity (A260/A280)	D	Not Applicable
Yield	D	Not Applicable
RNA integrity method/instrument	E	P11-12line227-234
RIN/RQI or Cq of 3' and 5' transcripts	E	P11-12line227-234
Electrophoresis traces	D	Not Applicable
Inhibition testing (Cq dilutions, spike or other)	E	P11-12line227-234
REVERSE TRANSCRIPTION
Complete reaction conditions	E	P11-12line227-234
Amount of RNA and reaction volume	E	P11-12line227-234
Priming oligonucleotide (if using GSP) and concentration	E	P11-12line227-234
Reverse transcriptase and concentration	E	P11-12line227-234
Temperature and time	E	P11-12line227-234
Manufacturer of reagents and catalogue numbers	D	Not Applicable
Cqs with and without RT	D*	Not Applicable
Storage conditions of cDNA	D	Not Applicable
qPCR TARGET INFORMATION
If multiplex, efficiency and LOD of each assay.	E	P11-12line227-234
Sequence accession number	E	P11-12line227-234
Location of amplicon	D	Not Applicable
Amplicon length	E	P11-12line227-234
In silico specificity screen (BLAST, etc)	E	P11-12line227-234
Pseudogenes, retropseudogenes or other homologs?	D	Not Applicable
Sequence alignment	D	Not Applicable
Secondary structure analysis of amplicon	D	Not Applicable
Location of each primer by exon or intron (if applicable)	E	P11-12line227-234
What splice variants are targeted?	E	P11-12line227-234
qPCR OLIGONUCLEOTIDES
Primer sequences	E	P11-12line227-234
RTPrimerDB Identification Number	D	Not Applicable
Probe sequences	D**	Not Applicable
Location and identity of any modifications	E	P11-12line227-234
Manufacturer of oligonucleotides	D	Not Applicable
Purification method	D	Not Applicable
qPCR PROTOCOL
Complete reaction conditions	E	P11-12line227-234
Reaction volume and amount of cDNA/DNA	E	P11-12line227-234
Primer, (probe), Mg++ and dNTP concentrations	E	P11-12line227-234
Polymerase identity and concentration	E	P11-12line227-234
Buffer/kit identity and manufacturer	E	P11-12line227-234
Exact chemical constitution of the buffer	D	Not Applicable
Additives (SYBR Green I, DMSO, etc.)	E	P11-12line227-234
Manufacturer of plates/tubes and catalog number	D	Not Applicable
Complete thermocycling parameters	E	P11-12line227-234
Reaction setup (manual/robotic)	D	Not Applicable
Manufacturer of qPCR instrument	E	P11-12line227-234
qPCR VALIDATION
Evidence of optimisation (from gradients)	D	Not Applicable
Specificity (gel, sequence, melt, or digest)	E	P11-12line227-234
For SYBR Green I, Cq of the NTC	E	P11-12line227-234
Standard curves with slope and y-intercept	E	P11-12line227-234
PCR efficiency calculated from slope	E	P11-12line227-234
Confidence interval for PCR efficiency or standard error	D	Not Applicable
r2 of standard curve	E	P11-12line227-234
Linear dynamic range	E	P11-12line227-234
Cq variation at lower limit	E	P11-12line227-234
Confidence intervals throughout range	D	Not Applicable
Evidence for limit of detection	E	P11-12line227-234
If multiplex, efficiency and LOD of each assay.	E	P11-12line227-234
DATA ANALYSIS
qPCR analysis program (source, version)	E	P11-12line227-234
Cq method determination	E	P11-12line227-234
Outlier identification and disposition	E	P11-12line227-234
Results of NTCs	E	P11-12line227-234
Justification of number and choice of reference genes	E	P11-12line227-234
Description of normalisation method	E	P11-12line227-234
Number and concordance of biological replicates	D	Not Applicable
Number and stage (RT or qPCR) of technical replicates	E	P11-12line227-234
Repeatability (intra-assay variation)	E	P11-12line227-234
Reproducibility (inter-assay variation, %CV)	D	Not Applicable
Power analysis	D	Not Applicable
Statistical methods for result significance	E	P11-12line227-234
Software (source, version)	E	P11-12line227-234
Cq or raw data submission using RDML	D	Not Applicable
Table 1. MIQE checklist for authors, reviewers and editors. All essential information (E) must be submitted with the manuscript. Desirable
information (D) should be submitted if available. If using primers obtained from RTPrimerDB, information on qPCR target, oligonucleotides,
protocols and validation is available from that source.
*: Assessing the absence of DNA using a no RT assay is essential when first extracting RNA. Once the sample has been validated as
RDNA-free, inclusion of a no-RT control is desirable, but no longer essential.
**: Disclosure of the probe sequence is highly desirable and strongly encouraged. However, since not all commercial pre-designed assay
vendors provide this information, it cannot be an essential requirement. Use of such assays is advised against.
